# Supplementary material for: Warmer temperature accelerates methane emissions from the Zoige wetland on the Tibetan Plateau without changing methanogenic community composition
Source: PubMed Central journal article supplement (PMC4479872; doi:10.1038/srep11616), 2015-06-25

1 **Warmer temperature accelerates methane emissions from**  
2 **the Zoige wetland on the Tibetan Plateau without changing**  
3 **methanogenic community composition**

4 Mengmeng Cui, Anzhou Ma\*, Hongyan Qi, Xuliang Zhuang, Guoqiang Zhuang\*,  
5 Guohui Zhao

6 **Supplementary information**

7 Surprisingly, the NC10 phylum was still observed in Fig.4b despite its low abundance  
8 (0.4% of E, 0.1% of P, 0.3% of C). Moreover the NC10 phylum continuously existed  
9 in the three groups (E, P and C) of all the three sampling time points (0-week, 8-week  
10 and 12-week), and the specific abundance of NC10 in the three groups almost  
11 remained constantly as the other dominant phyla of bacteria. Because anaerobic  
12 methane oxidation coupled to denitrification (N-DAMO) was recently assigned to  
13 bacteria belonging to the uncultured NC10 phylum<sup>1</sup>, which may play a role in CH<sub>4</sub>  
14 emissions from the Zoige wetland. Similarly, a previous study also detected *pmoA*  
15 (the alpha subunit of particulate methane monooxygenase sequence) from  
16 “*Candidatus Methyloirabilis oxyfera*” (*M. oxyfera*) – a member of the uncultured  
17 NC10 phylum in the Zoige wetland<sup>2</sup>.

18

- 19 1. Ettwig, K. F. *et al.* Enrichment and molecular detection of denitrifying  
20 methanotrophic bacteria of the NC10 phylum. *Appl. Environ. Microb.* **75**,  
21 3656–3662 (2009).
- 22 2. Luesken, F. A. *et al.* *pmoA* primers for detection of anaerobic methanotrophs.  
23 *Appl. Environ. Microb.* **77**, 3877–3880 (2011).

24 **Table S1** Diversity indices for the sample of Illumina sequencing

| Sample | Diversity index |       |                |
|--------|-----------------|-------|----------------|
|        | Chao1           | OTU   | Shannon-Wiener |
| E0     | 77774           | 14255 | 11.3976        |
| P0     | 89301           | 15954 | 11.87978       |
| C0     | 72863           | 13212 | 10.37275       |
| E8a    | 92211           | 15471 | 11.73357       |
| E8b    | 86825.96        | 15331 | 11.67432       |
| E12a   | 89112           | 15340 | 11.77361       |
| E12b   | 101785          | 16708 | 12.09625       |
| P8a    | 79997           | 15552 | 12.12393       |
| P8b    | 75790           | 15131 | 12.08339       |
| P12a   | 80168           | 15257 | 12.02257       |
| P12b   | 80156           | 15507 | 12.14794       |
| C8a    | 87972           | 15111 | 11.70994       |
| C8b    | 87525           | 15536 | 11.78964       |
| C12a   | 98415           | 16011 | 11.97175       |
| C12b   | 84781           | 16015 | 12.0003        |

25 *Eleocharis valleculosa*, *Polygonum amphibium*, *Carex muliensis*; 0,0-week; 8,8-week;

26 12,12-week; a, 15 °C; b, 20 °C.

27

28 **Table S2** The proportion of the top 10 most abundant bacterial phylum shared by the  
 29 three kinds of incubation groups: *Eleocharis valliculosa* (E), *Polygonum amphibium*  
 30 (P) and *Carex muliensis* (C).

| Group                   | Bacterial phylum (%) |       |       |
|-------------------------|----------------------|-------|-------|
|                         | E                    | P     | C     |
| <i>Proteobacteria</i>   | 26-38                | 30-36 | 24-38 |
| <i>Bacteroidetes</i>    | 10-13                | 7-15  | 9-24  |
| <i>Actinobacteria</i>   | 6                    | 15    | 5     |
| <i>Firmicutes</i>       | 4-7                  | 4-7   | 3-12  |
| <i>Acidobacteria</i>    | 2-5                  | 4-8   | 2-5   |
| <i>Planctomycetes</i>   | 2.5                  | 3     | 2     |
| <i>Verrucomicrobia</i>  | 1                    | 2     | 1     |
| <i>Chlorobi</i>         | 15                   | 0.4   | 1     |
| <i>Gemmatimonadetes</i> | 0.3                  | 2     | 0.5   |
| OP8                     | 1.5                  | 0.2   | 1     |

31

32

33

34

35

36

37

38 **Table S3** The partial correlation analysis of the site specific factors affecting CH<sub>4</sub>  
 39 emissions in the Zoige wetland by SPSS.

| Correlations<br>with CH <sub>4</sub><br>emissions <sup>a</sup> | 15 °C             |                            | 20 °C       |                            |
|----------------------------------------------------------------|-------------------|----------------------------|-------------|----------------------------|
|                                                                | Correlation       | Significance<br>(2-tailed) | Correlation | Significance<br>(2-tailed) |
| Vegetation                                                     | 0.959             | <10 <sup>-4</sup> **       | 0.989       | <10 <sup>-4</sup> **       |
| OM <sup>b</sup>                                                | 0.280             | 0.466                      | 0.438       | 0.238                      |
| pH                                                             | <10 <sup>-4</sup> | 1                          | 0.109       | 0.780                      |
| Moisture                                                       | 0.516             | 0.155                      | 0.381       | 0.312                      |
| NH <sub>4</sub> <sup>+</sup> -N                                | 0.443             | 0.232                      | 0.299       | 0.43                       |
| Total-P                                                        | 0.064             | 0.871                      | 0.225       | 0.561                      |

40 <sup>a</sup> Cell contain zero-order (Pearson) correlation

41 <sup>b</sup> OM, organic matter

42 \*\*, P<0.01.

43

44

45

46

47

48

49

50

51 **Table S4** The proportion of the two methanotrophic families in the three kinds of  
52 incubation groups: *Eleocharis valleculosa* (E), *Polygonum amphibium* (P) and *Carex*  
53 *muliensis* (C).

| Group | Methanotrophic families (%)         |                                      |
|-------|-------------------------------------|--------------------------------------|
|       | <i>Methylococcaceae</i><br>(type I) | <i>Methylocystaceae</i><br>(type II) |
| E     | 1.8-2.1                             | 0-0.1                                |
| P     | 1-2                                 | 0-0.1                                |
| C     | 0.7-1.5                             | 0-0.1                                |

54

55

56

57

58

59

60

61

62

63

64

65

66

67 **Fig.S1** The pH values and concentrations of acetate in incubation at 15 and 20 °C  
 68 using samples from three kinds of plant-dominated soil in Zoige wetlands, i.e.,  
 69 *Eleocharis valliculosa*, *Polygonum amphibium*, *Carex multiensis*; mean  $\pm$  SE<sub>mean</sub>, n=3.

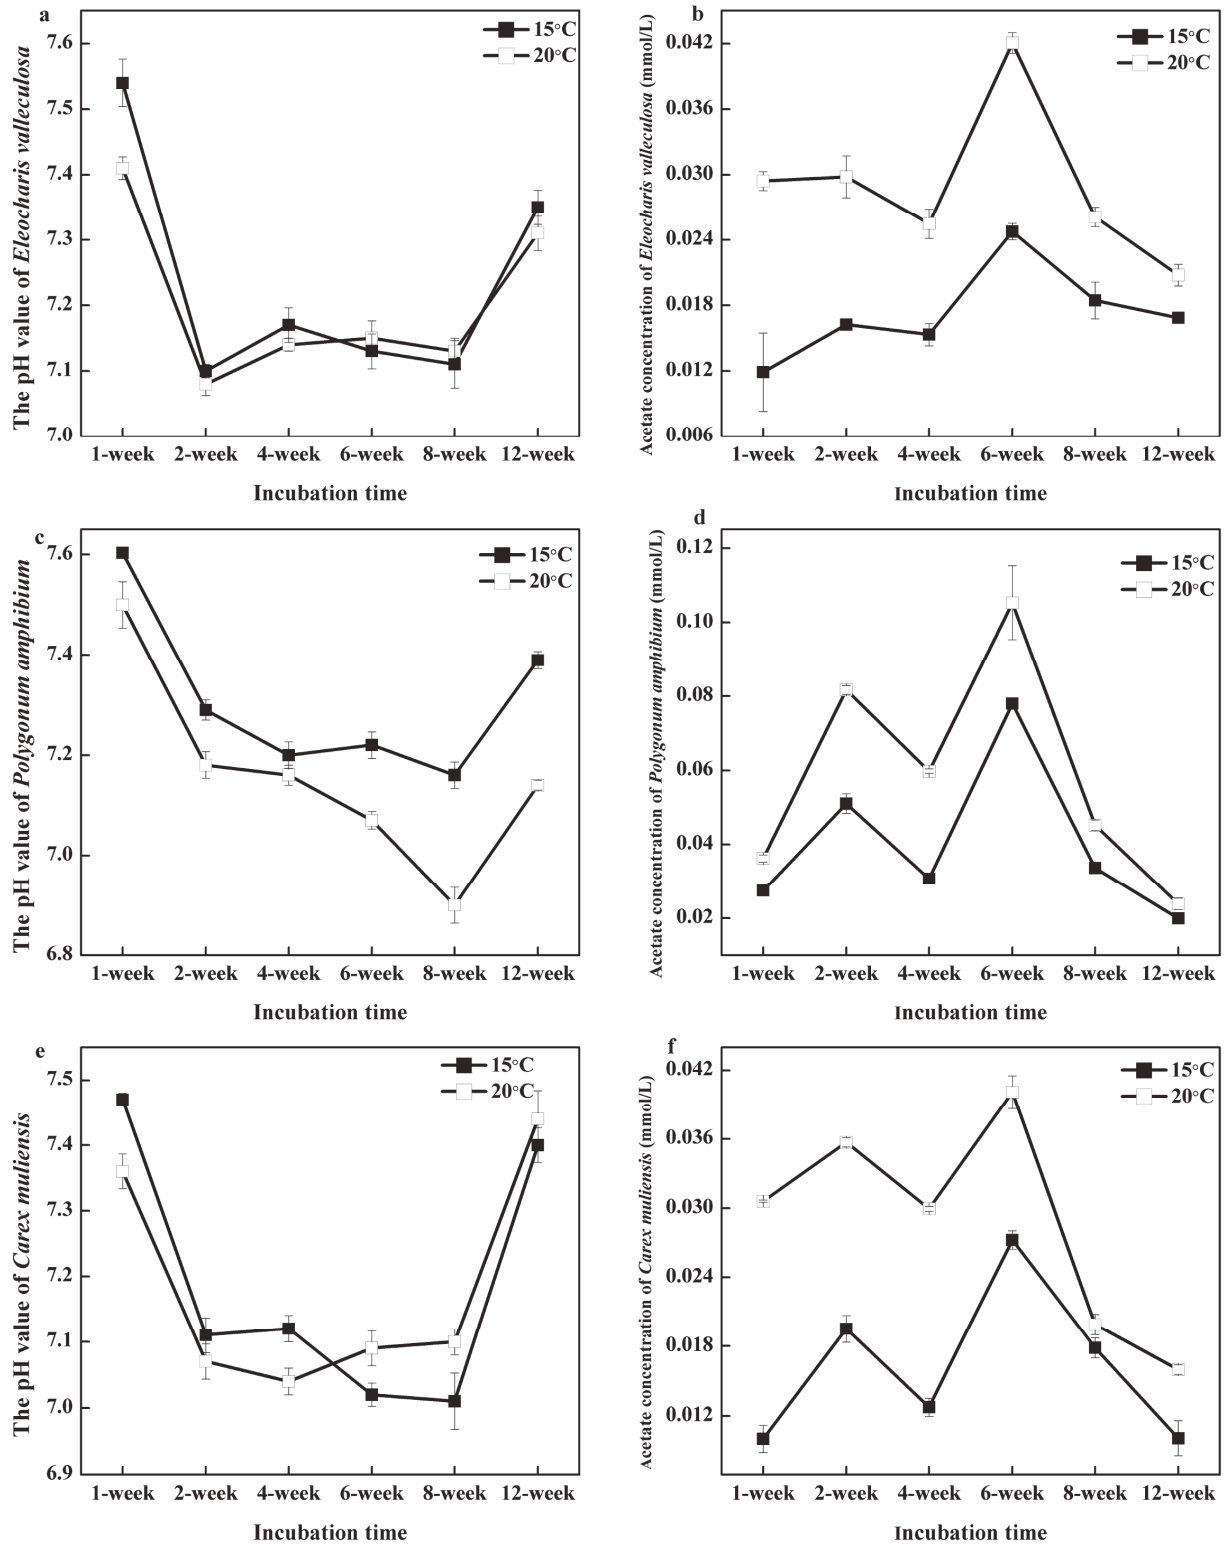

71 **Fig.S2** Relative abundance of individual T-RFs from T-RFLP analysis targeting  
 72 archaeal 16S rRNA genes in incubation at 15 and 20 °C using samples from three  
 73 kinds of plant-dominated soil in Zoige wetlands, i.e., *Eleocharis valleculosa*,  
 74 *Polygonum amphibium*, *Carex muliensis*; mean  $\pm$  SE<sub>mean</sub>, n=3.T-RFs, terminal  
 75 restriction fragments; T-RFLP, terminal restriction fragment length polymorphism; Ar,  
 76 archaea.

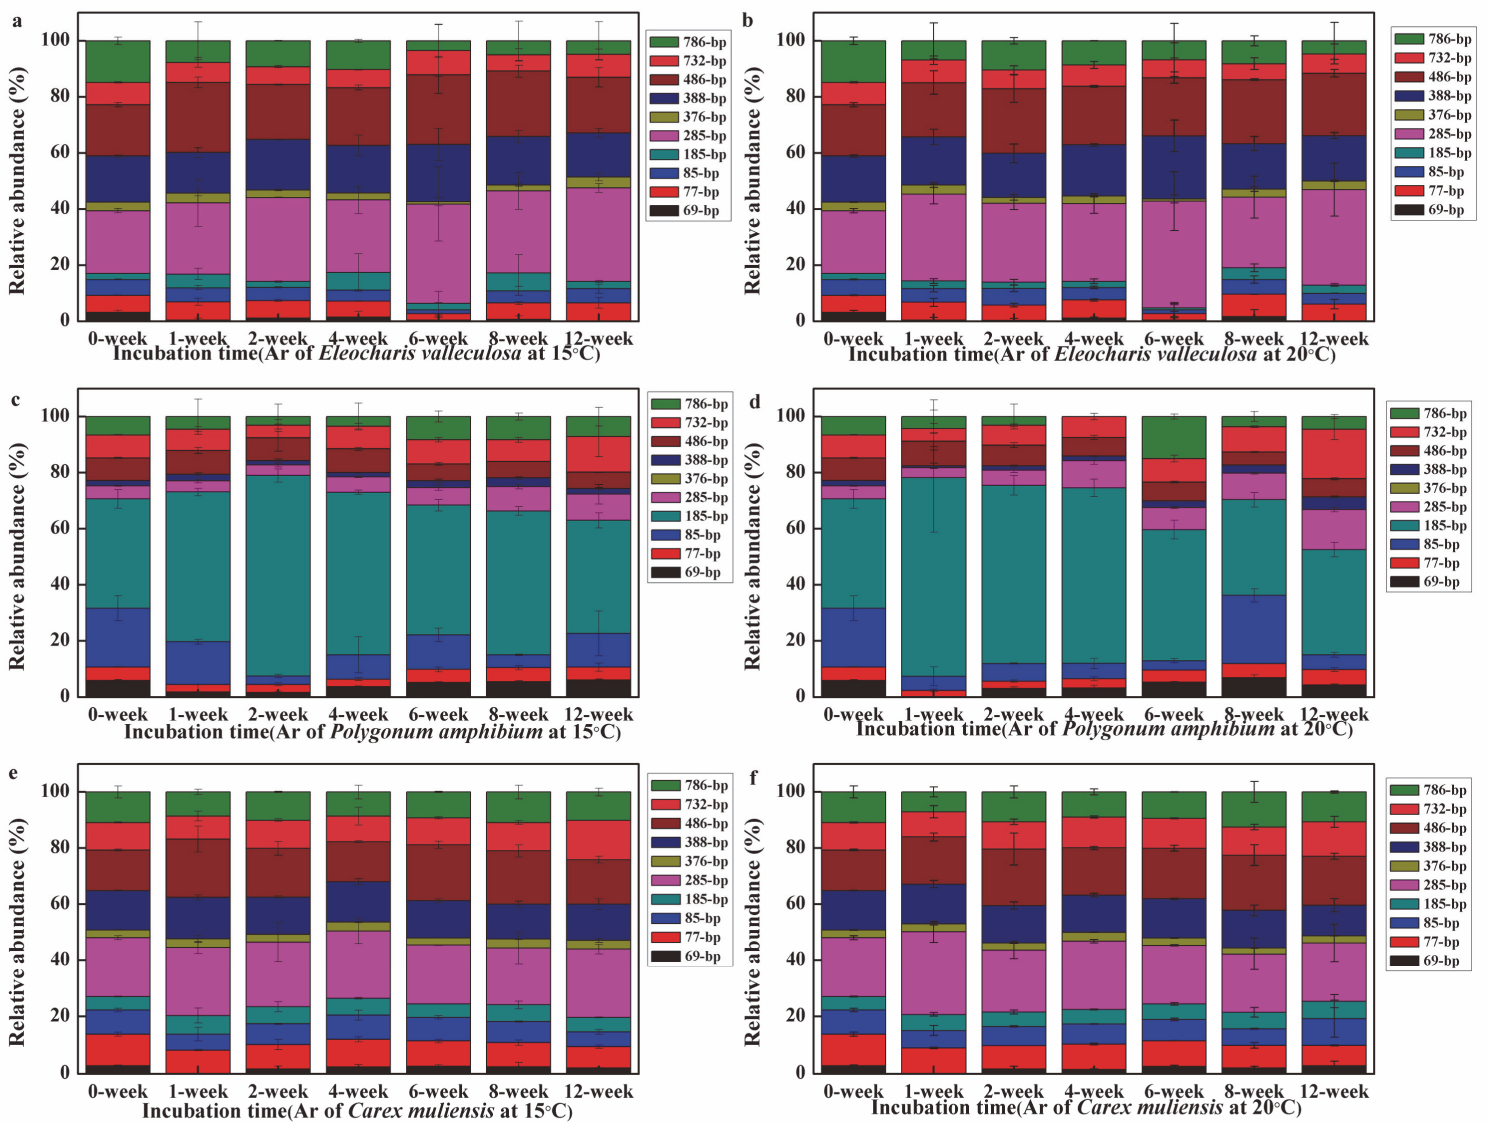

90

91

92 **Fig.S3** Relative abundance of individual T-RFs from T-RFLP analysis targeting  
 93 bacterial 16S rRNA genes in incubation at 15 and 20 °C using samples from three  
 94 kinds of plant-dominated soil in Zoige wetlands, i.e., *Eleocharis valleculosa*,  
 95 *Polygonum amphibium*, *Carex muliensis*; mean  $\pm$  SE<sub>mean</sub>, n=3.T-RFs, terminal  
 96 restriction fragments; T-RFLP, terminal restriction fragment length polymorphism; Ba,  
 97 bacteria.

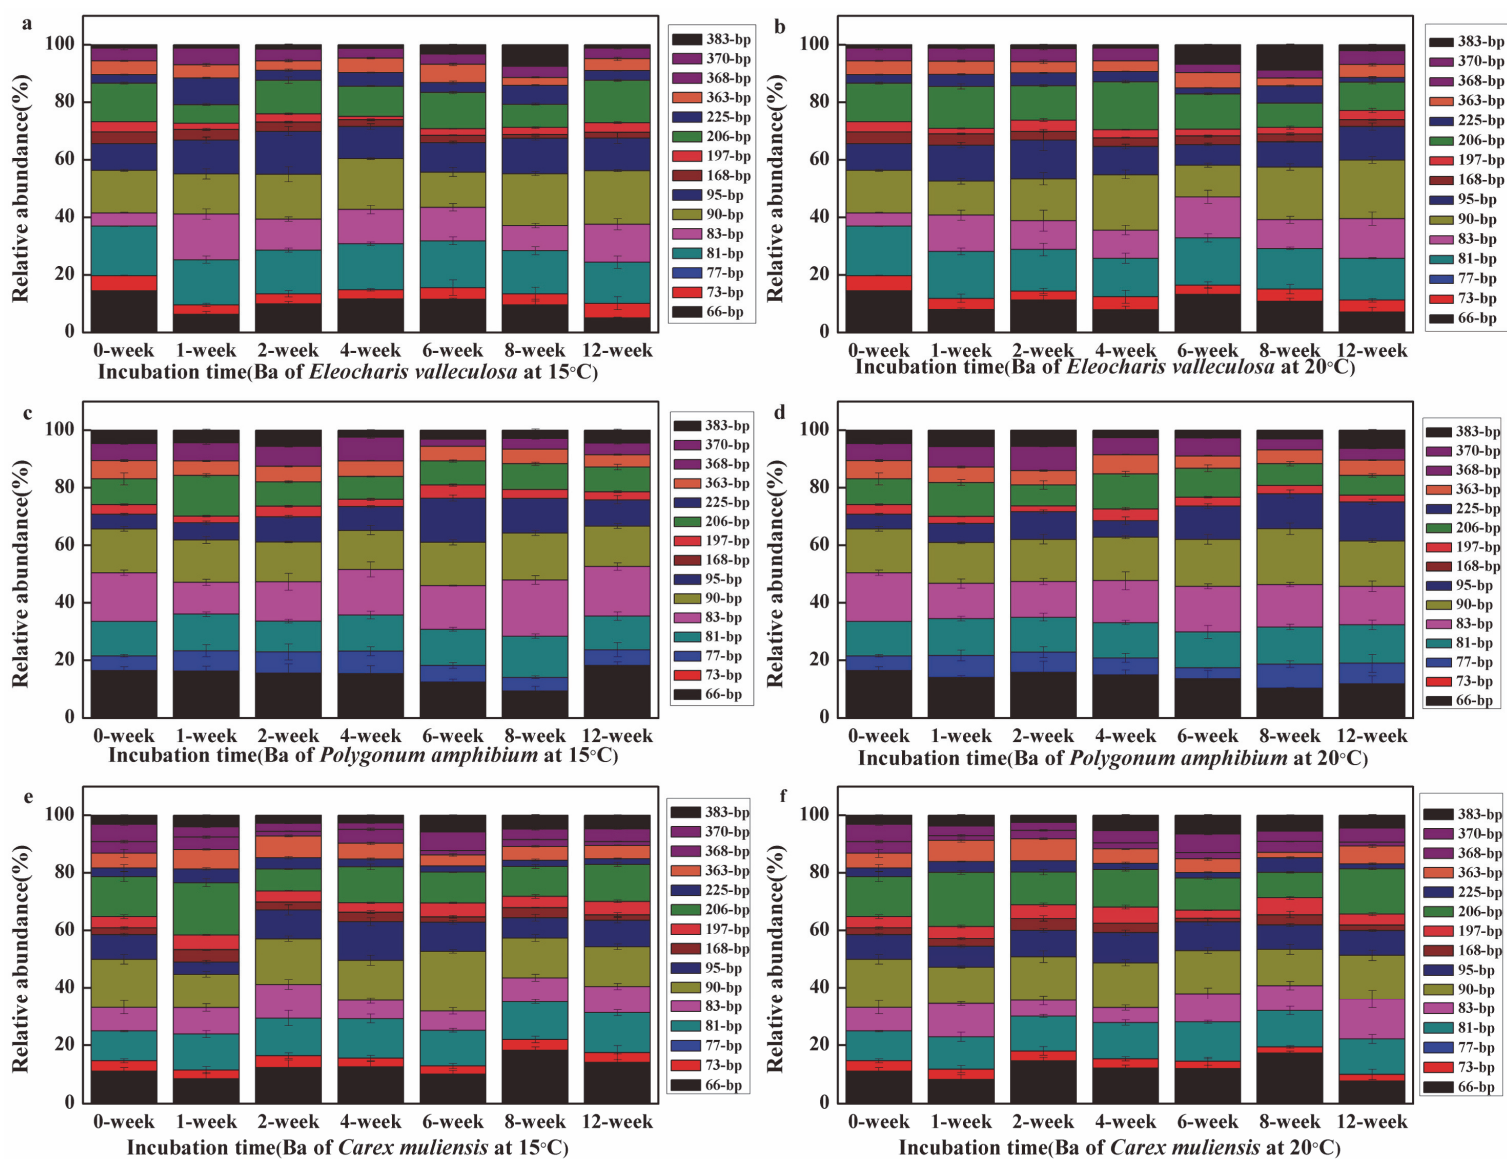



113 **Fig.S4**  $\alpha$ -Diversity comparison. Rarefaction curves for observed OTUs (a) and  
 114 Shannon-Wiener index (b) were calculated using QIIME with reads normalized to  
 115 38,200 for each sample using 0.03 distance OTUs. *Eleocharis valleculosa*,  
 116 *Polygonum amphibium*, *Carex muliensis*; 0,0-week; 8,8-week; 12,12-week; a, 15 °C;  
 117 b, 20 °C.

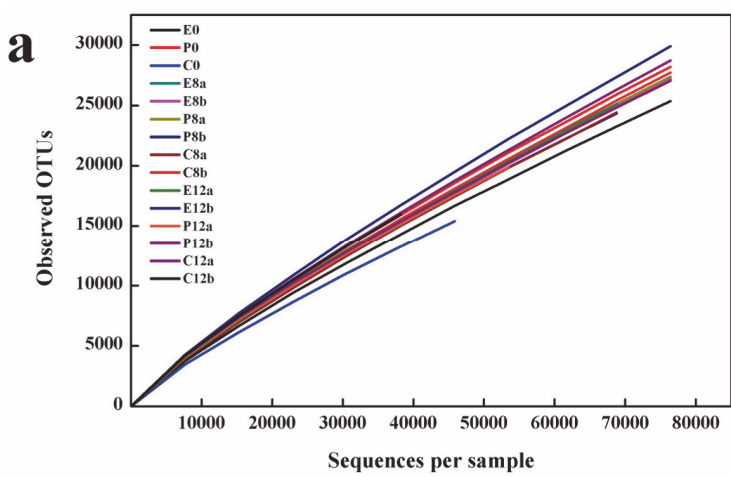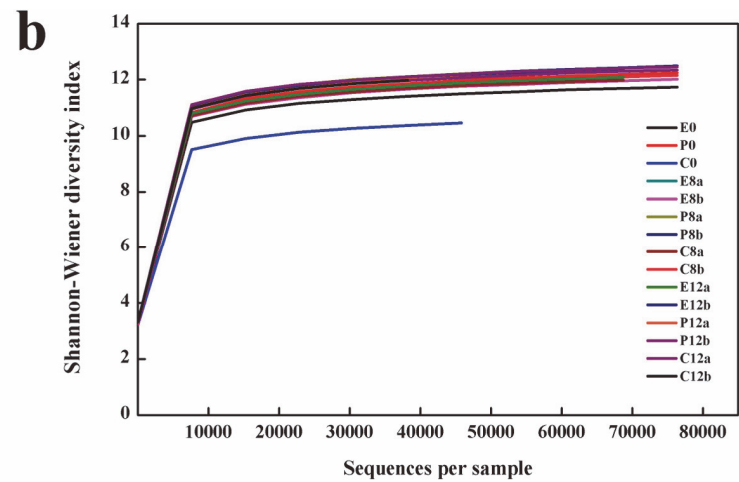

124

125

126

127

128

129

130

131

132

133

134 **Fig.S5** Cluster analysis of OTUs: Archaea (a) and Bacteria (b), showing the status of  
 135 species classification clustering (horizontal clustering) and sample clustering (vertical  
 136 clustering) according to the species abundance level of each sample. Different colors  
 137 meaning the degree of aggregation of species among different samples.

138

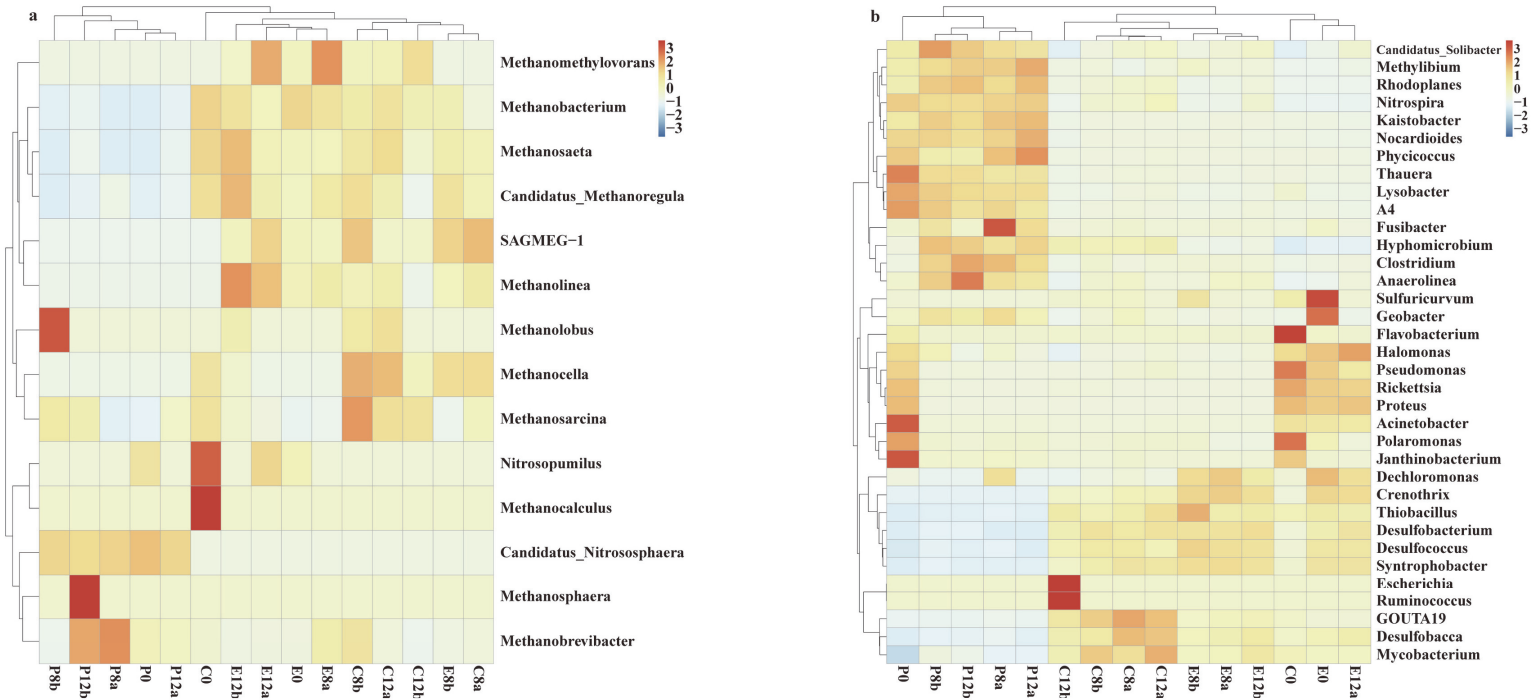

Supplement: srep11616-s1.pdf [file srep11616-s1.pdf]
